# Supplementary material for: Burden of malaria is higher among children in an internal displacement camp compared to a neighbouring village in the Democratic Republic of the Congo
Source: Springer Nature journal article supplement (doi:10.1186/s12936-016-1479-z), 2016-08-25
Supplement: MOESM1 [file 10619794]

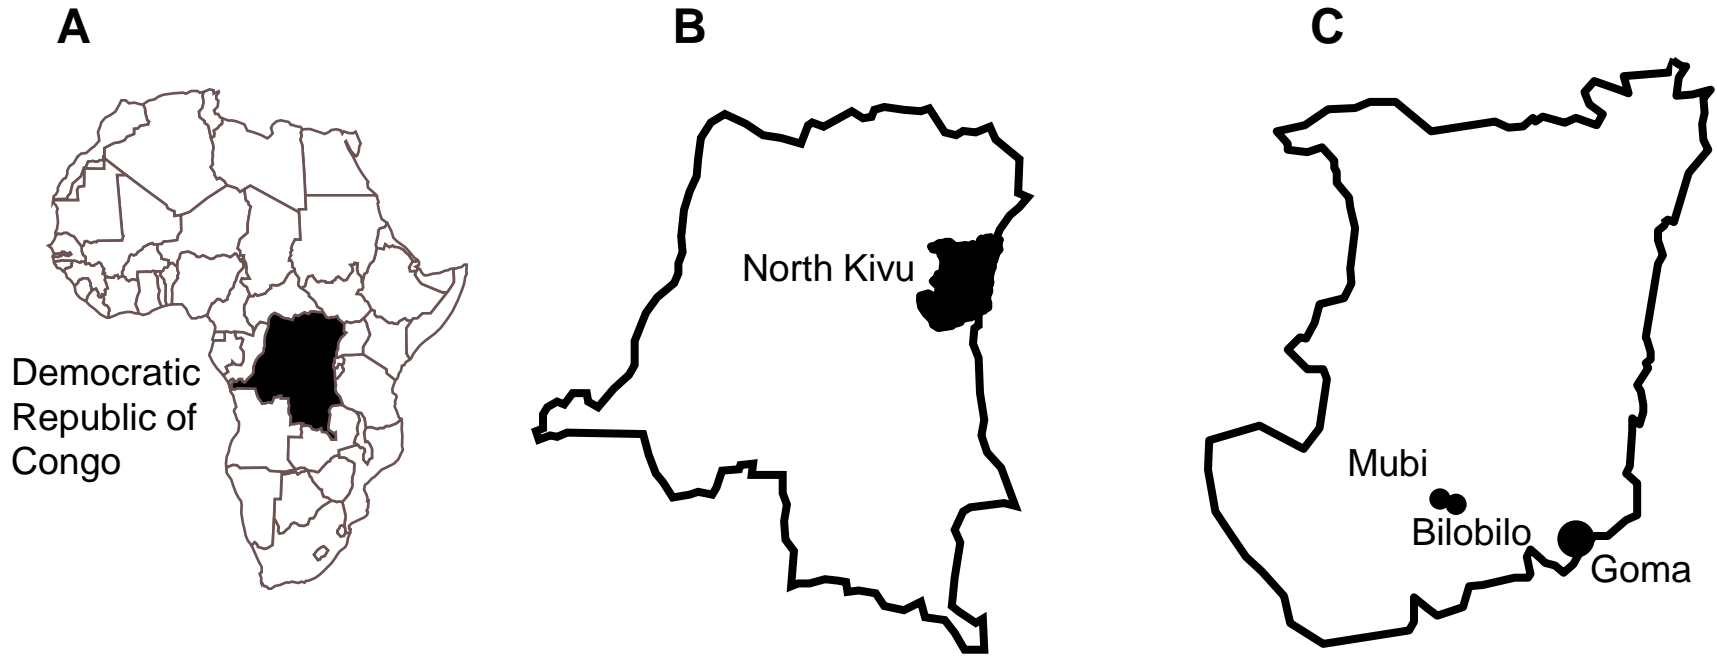

**Supplemental Figure 1.** Map showing A. Democratic Republic of Congo (DRC) within Africa, B. North Kivu within the DRC, and C. Location of study sites Mubi and Bilobilo within North Kivu and relative to the provincial capital, Goma.
